# Supplementary material
Source: Springer Nature journal article supplement (https://www.springermedizin.de/resource/supplementary/12933_2010_309_MOESM3_ESM.pdf/9540074)

**A**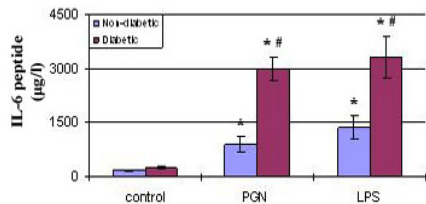**B**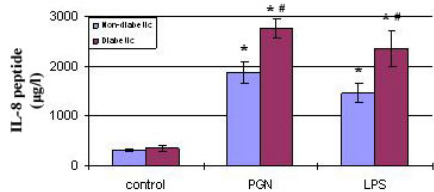**C**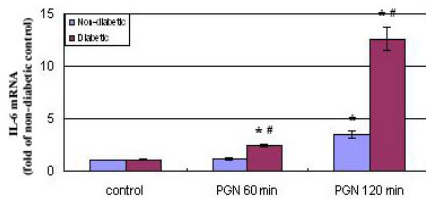**D**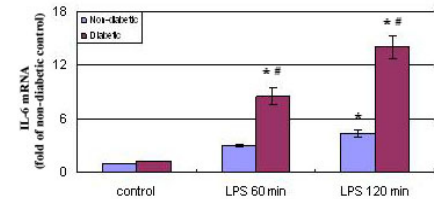**E**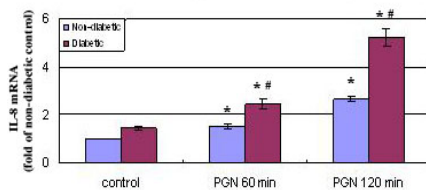**F**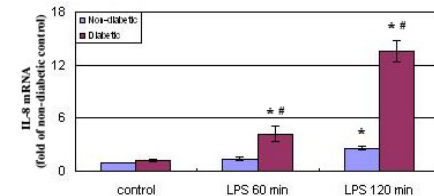

Supplement: MOESM3 [file 9540074]
